# Supplementary material
Source: publisher site journal article supplement (https://www.dovepress.com/article/523846)
Supplement: Supplementary file 1 [file 523846%20Supplementary%20file.docx]

**Supplementary Table 1. Attributes included in adaptive self-explication-based survey**

| **Theme** | |  | **Attribute**  **(HCP Language)** |  | **HCP Levels**  **(Order: worst to best)** | **Attribute**  **(Patient Language)** |  | **Patient Levels**  **(Order: worst to best)** |
| --- | --- | --- | --- | --- | --- | --- | --- | --- |
| Efficacy | Key Endpoint | 1 | % of patients achieving a clinically meaningful improvement in menstrual bleeding (defined as MBL volume <80 mL and reduction of ≥50%) at 6 months from baseline | 1 | 50% of patients | Chance of achieving a meaningful improvement in menstrual bleeding that impacts your daily life after 6 months of treatment | 1 | Low chance |
| 2 | 55% of patients | 2 | Some chance |
| 3 | 60% of patients | 3 | Moderate chance |
| 4 | 65% of patients | 4 | High chance |
| 5 | 70% of patients | 5 | Very high chance |
| 6 | 75% of patients | - | - |
| 7 | 80% of patients | - | - |
| Efficacy | Key Endpoint | 2 | Mean time to a clinically meaningful improvement in menstrual bleeding (defined as MBL volume <80 mL and reduction of ≥50%) | 1 | 12 months | Time to meaningful improvement in menstrual bleeding that impacts your daily life | 1 | 12 months |
| 2 | 9 months | 2 | 9 months |
| 3 | 6 months | 3 | 6 months |
| 4 | 3 months | 4 | 3 months |
| 5 | 2 months | 5 | 2 months |
| 6 | 1 month | 6 | 1 month |
| Efficacy | Key Endpoint | 3 | Mean % reduction in MBL at 6 months | 1 | 20% | Reduction in MBL after 6 months of treatment | 1 | No reduction |
| 2 | 30% | 2 | Some reduction |
| 3 | 40% | 3 | Moderate reduction |
| 4 | 50% | 4 | High reduction |
| 5 | 60% | 5 | Very high reduction |
| 6 | 70% | - | - |
| 7 | 80% | - | - |
| 8 | 90% | - | - |
| 9 | 100% | - | - |
| Efficacy | Key Endpoint | 4 | % of patients achieving MBL volume <80 mL at 6 months from baseline | 1 | 50% of patients | Chance of achieving normal MBL after 6 months of treatment  *(Using 4*–*5 regular size pads per day can be considered normal.)* | 1 | Low chance |
| 2 | 55% of patients | 2 | Some chance |
| 3 | 60% of patients | 3 | Moderate chance |
| 4 | 65% of patients | 4 | High chance |
| 5 | 70% of patients | 5 | Very high chance |
| 6 | 75% of patients | - | - |
| 7 | 80% of patients | - | - |
| Efficacy | Key Endpoint | 5 | % of patients with a reduction in MBL volume ≥50% at 6 months from baseline | 1 | 50% of patients | N/A* | - | - |
| 2 | 55% of patients | - | - |
| 3 | 60% of patients | - | - |
| 4 | 65% of patients | - | - |
| 5 | 70% of patients | - | - |
| 6 | 75% of patients | - | - |
| 7 | 80% of patients | - | - |
| Efficacy | Key Endpoint | 6 | % of patients achieving amenorrhea at 6 months from baseline | 1 | 40% of patients | Chance of achieving absence of menstruation (no bleeding) after 6 months of treatment | 1 | Low chance |
| 2 | 45% of patients | 2 | Some chance |
| 3 | 50% of patients | 3 | Moderate chance |
| 4 | 55% of patients | 4 | High chance |
| 5 | 60% of patients | 5 | Very high chance |
| 6 | 65% of patients | - | - |
| 7 | 70% of patients | - | - |
| Efficacy | Key Endpoint | 7 | % reduction in fibroid volume at 6 months from baseline | 1 | 10% | Reduction in size of fibroids after 6 months of treatment | 1 | No reduction |
| 2 | 20% | 2 | Some reduction |
| 3 | 30% | 3 | Moderate reduction |
| 4 | 40% | 4 | High reduction |
| 5 | 50% | 5 | Very high reduction |
| 6 | 60% | - | - |
| 7 | 70% | - | - |
| Efficacy | Key Endpoint | 8 | % reduction in uterine volume at 6 months from baseline | 1 | 10% | Reduction in size of uterus after 6 months of treatment | 1 | No reduction |
| 2 | 20% | 2 | Some reduction |
| 3 | 30% | 3 | Moderate reduction |
| 4 | 40% | 4 | High reduction |
| 5 | 50% | 5 | Very high reduction |
| 6 | 60% | - | - |
| 7 | 70% | - | - |
| Efficacy | Secondary Endpoint | 9 | % of anemic patients (hemoglobin level ≤ 10.5 g/dL) with improvement in hemoglobin levels (>2 g/dL) at 6 months after baseline | 1 | 40% of patients | Chance of achieving an improvement in anemia after 6 months of treatment | 1 | Low chance |
| 2 | 45% of patients | 2 | Some chance |
| 3 | 50% of patients | 3 | Moderate chance |
| 4 | 55% of patients | 4 | High chance |
| 5 | 60% of patients | 5 | Very high chance |
| 6 | 65% of patients | - | - |
| 7 | 70% of patients | - | - |
| Efficacy | Durability | 10 | Duration of clinical evidence (how long the medicine has been studied before it becomes available to UF patients) | 1 | 1 year | How long the medicine has been studied before it becomes available to UF patients | 1 | 1 year |
| 2 | 2 years | 2 | 2 years |
| 3 | 3 years | 3 | 3 years |
| 4 | 4 years | 4 | 4 years |
| Efficacy | PRO | 11 | % of patients with clinically meaningful improvement in bleeding and pelvic discomfort (via a validated instrument that focuses on heavy menstrual bleeding, passing blood clots, pelvic pressure, and tightness) at 6 months from baseline | 1 | 20% of patients | Chance of experiencing a meaningful improvement in bleeding and pelvic pressure after 6 months of treatment | 1 | Low chance |
| 2 | 30% of patients | 2 | Some chance |
| 3 | 40% of patients | 3 | Moderate chance |
| 4 | 50% of patients | 4 | High chance |
| 5 | 60% of patients | 5 | Very high chance |
| 6 | 70% of patients | - | - |
| 7 | 80% of patients | - | - |
| Efficacy | PRO | 12 | Mean change (reduction) in symptom severity at 6 months from baseline (as measured by UFS-QOL questionnaire, 0–100 scale) | 1 | 10-point reduction | Improvement in symptom severity at 6 months after starting treatment | 1 | No improvement |
| 2 | 20-point reduction | 2 | Some improvement |
| 3 | 30-point reduction | 3 | Moderate improvement |
| 4 | 40-point reduction | 4 | Strong improvement |
| 5 | 50-point reduction | 5 | Very strong improvement |
| 6 | 60-point reduction | - | - |
| 7 | - | - | - |
| 8 | - | - | - |
| 9 | - | - | - |
| 10 | - | - | - |
| Efficacy | PRO | 13 | Mean change (reduction) in concern at 6 months from baseline (as measured by UFS-QOL questionnaire, 0–100 scale) | 1 | 10-point reduction | Improvement in concerns at 6 months after starting treatment  *(i.e.,* *concerned about soiling underwear, not knowing when a period would start or how long it would last)* | 1 | No improvement |
| 2 | 20-point reduction | 2 | Some improvement |
| 3 | 30-point reduction | 3 | Moderate improvement |
| 4 | 40-point reduction | 4 | Strong improvement |
| 5 | 50-point reduction | 5 | Very strong improvement |
| 6 | 60-point reduction | - | - |
| 7 | - | - | - |
| 8 | - | - | - |
| 9 | - | - | - |
| 10 | - | - | - |
| Efficacy | PRO | 14 | Mean change (increase) in daily activities at 6 months from baseline (as measured by UFS-QOL questionnaire, 0–100 scale) | 1 | 10-point increase | Improvement in daily activities at 6 months after starting treatment  *(Daily activities include travel, exercise, social activities, usual daily activities, and the planning of these activities, etc.)* | 1 | No improvement |
| 2 | 20-point increase | 2 | Some improvement |
| 3 | 30-point increase | 3 | Moderate improvement |
| 4 | 40-point increase | 4 | Strong improvement |
| 5 | 50-point increase | 5 | Very strong improvement |
| 6 | 60-point increase | - | - |
| 7 | - | - | - |
| 8 | - | - | - |
| 9 | - | - | - |
| 10 | - | - | - |
| Efficacy | PRO | 15 | Mean change (increase) in energy and mood at 6 months from baseline (as measured by UFS-QOL questionnaire, 0–100 scale) | 1 | 10-point increase | Improvement in energy and mood at 6 months after starting treatment  *(Fatigue, mood effects on mental/emotional health, etc.)* | 1 | No improvement |
| 2 | 20-point increase | 2 | Some improvement |
| 3 | 30-point increase | 3 | Moderate improvement |
| 4 | 40-point increase | 4 | Strong improvement |
| 5 | 50-point increase | 5 | Very strong improvement |
| 6 | 60-point increase | - | - |
| 7 | - | - | - |
| 8 | - | - | - |
| 9 | - | - | - |
| 10 | - | - | - |
| Efficacy | PRO | 16 | Mean change (improvement) in control (i.e., ability to control own body) at 6 months from baseline (as measured by UFS-QOL questionnaire, 0–100 scale) | 1 | 10-point increase | Improvement in control at 6 months after starting treatment  *(i.e.,* *feelings of control over one’s health, life, and future uncertainty*) | 1 | No improvement |
| 2 | 20-point increase | 2 | Some improvement |
| 3 | 30-point increase | 3 | Moderate improvement |
| 4 | 40-point increase | 4 | Strong improvement |
| 5 | 50-point increase | 5 | Very strong improvement |
| 6 | 60-point increase | - | - |
| 7 | - | - | - |
| 8 | - | - | - |
| 9 | - | - | - |
| 10 | - | - | - |
| Efficacy | PRO | 17 | Mean change (improvement) in self-consciousness at 6 months from baseline (as measured by UFS-QOL questionnaire, 0–100 scale) | 1 | 10-point increase | Improvement in self-consciousness at 6 months after starting treatment  *(i.e., feel conscious about the size and appearance of your stomach)* | 1 | No improvement |
| 2 | 20-point increase | 2 | Some improvement |
| 3 | 30-point increase | 3 | Moderate improvement |
| 4 | 40-point increase | 4 | Strong improvement |
| 5 | 50-point increase | 5 | Very strong improvement |
| 6 | 60-point increase | - | - |
| 7 | - | - | - |
| 8 | - | - | - |
| 9 | - | - | - |
| 10 | - | - | - |
| Efficacy | PRO | 18 | Mean change (improvement) in sexual function at 6 months from baseline (as measured by UFS-QOL questionnaire, 0–100 scale) | 1 | 10-point increase | Improvement in sexual function at 6 months after starting treatment  *(i.e., diminished or low sexual desire, making you avoid sexual activities)* | 1 | No improvement |
| 2 | 20-point increase | 2 | Some improvement |
| 3 | 30-point increase | 3 | Moderate improvement |
| 4 | 40-point increase | 4 | Strong improvement |
| 5 | 50-point increase | 5 | Very strong improvement |
| 6 | 60-point increase | - | - |
| 7 | - | - | - |
| 8 | - | - | - |
| 9 | - | - | - |
| 10 | - | - | - |
| Efficacy | PRO | 19 | % of patients with UF-associated pain at baseline, with self-reported improvement in menstrual pain (dysmenorrhea) at 6 months from baseline | 1 | 20% | Improvement in pain during the menstrual period after 6 months of treatment | 1 | No improvement |
| 2 | 30% | 2 | Some improvement |
| 3 | 40% | 3 | Moderate improvement |
| 4 | 50% | 4 | Strong improvement |
| 5 | 60% | 5 | Very strong improvement |
| 6 | 70% | - | - |
| 7 | 80% | - | - |
| Efficacy | PRO | 20 | % of patients with UF-associated pain at baseline, with self-reported improvement in non-menstrual pain associated with UF at 6 months from baseline | 1 | 20% | Improvement in non-menstrual UF-related pain after 6 months of treatment | 1 | No improvement |
| 2 | 30% | 2 | Some improvement |
| 3 | 40% | 3 | Moderate improvement |
| 4 | 50% | 4 | Strong improvement |
| 5 | 60% | 5 | Very strong improvement |
| 6 | 70% | - | - |
| 7 | 80% | - | - |
| Efficacy | Surgery | 21 | Impact of medication on myomectomy | 1 | Delays the time to myomectomy | Impact of medication on the need for myomectomy as a treatment option for uterine fibroids  *(A myomectomy is a surgical procedure to remove uterine fibroids.)* | 1 | Delays the time until uterine fibroid removal surgery is needed |
| 2 | Reduces the probability of myomectomy | 2 | Reduces the chance that uterine fibroid removal surgery is needed |
| 3 | Eliminates the need for myomectomy | 3 | Eliminates the need for uterine fibroid removal surgery |
| Efficacy | Surgery | 22 | Impact of medication on hysterectomy | 1 | Delays the time to hysterectomy | Impact of medication on the need for hysterectomy as a treatment option for uterine fibroids  *(A hysterectomy is a surgical procedure to remove the womb (uterus). A hysterectomy sometimes includes the removal of the ovaries (called an “oophorectomy”); however, for this exercise, please consider a hysterectomy to be only the removal of the uterus.)* | 1 | Delays the time until hysterectomy is needed |
| 2 | Reduces the probability of hysterectomy | 2 | Reduces the chance that hysterectomy is needed |
| 3 | Eliminates the need for a hysterectomy | 3 | Eliminates the need for a hysterectomy |
| Efficacy | Surgery | 23 | % of patients not requiring surgery because of treatment | 1 | 20% | N/A* | - | - |
| 2 | 30% | - | - |
| 3 | 40% | - | - |
| 4 | 50% | - | - |
| 5 | 60% | - | - |
| 6 | 70% | - | - |
| 7 | 80% | - | - |
| Safety | Bone Loss | 24 | % of patients with reduction in mean bone mineral density at lumbar spine due to drug effect (not age-related) at 1 year from baseline | 1 | 20% | N/A* | - | - |
| 2 | 30% | - | - |
| 3 | 40% | - | - |
| 4 | 50% | - | - |
| 5 | 60% | - | - |
| 6 | 70% | - | - |
| 7 | 80% | - | - |
| Safety | Secondary Endpoint | 25 | Acceptable % of patients with reduction in mean bone mineral density at lumbar spine due to drug effect (not age-related) at 1 year from baseline | 1 | -3% | Change in bone mineral density at lumbar spine due to drug effect (not age-related) after 1 year of treatment  *(Low bone mineral density is associated with increased risk of fracture.)* | 1 | Significant change |
| 2 | -2% | 2 | Moderate change |
| 3 | -1% | 3 | Little change |
| 4 | No change | 4 | No change |
|  |  |  |  |
| Safety | Tolerability | 26 | % of patients who discontinue treatment due to side effects 6 months from baseline | 1 | 10% | Number of women who stop taking treatment due to any side effect after 6 months of treatment | 1 | Many women have stopped taking treatment |
| 2 | 8% | 2 | Some women have stopped taking treatment |
| 3 | 6% | 3 | Few women have stopped taking treatment |
| 4 | 4% | 4 | No women have to stop taking treatment |
| 5 | 2% | - | - |
| 6 | No discontinuation | - | - |
| Safety | Adverse Events | 27 | % of patients with treatment-related vasomotor symptoms like hot flashes or night sweats at 6 months from the start of treatment | 1 | 30% | Number of women who have symptoms like hot flashes or night sweats after 6 months of treatment | 1 | Many women have these symptoms |
| 2 | 25% | 2 | Some women have these symptoms |
| 3 | 20% | 3 | Few women have these symptoms |
| 4 | 15% | 4 | No women have these symptoms |
| 5 | 10% | - | - |
| 6 | 5% | - | - |
| Safety | Adverse Events | 28 | % of patients with treatment-related alopecia | 1 | 10% | Number of women with symptoms like alopecia (general hair loss) | 1 | Many women have these symptoms |
| 2 | 7% | 2 | Some women have these symptoms |
| 3 | 5% | 3 | Few women have these symptoms |
| 4 | 3% | 4 | No women have these symptoms |
| 5 | 1% | - | - |
| Safety | Black Box Warning | 29 | Medication comes with a black box warning related to increased risk of thromboembolic and cardiovascular events (e.g., DVT/PE) | 1 | No | Medication comes with a warning related to increased risk of thromboembolic (reduction in blood flow) and heart-related events | 1 | No |
| 2 | Yes | 2 | Yes |
| Dosing / Administration | Dosing | 30 | Dosing schedule | 1 | Once daily, one pill | Dosing schedule | 1 | Once daily, one pill |
| 2 | Twice daily, one pill in AM and PM | 2 | Twice daily, one pill in AM and PM |
| 3 | Once daily, two pills | 3 | Once daily, two pills |
| 4 | Twice daily, two pills in AM, one in PM | 4 | Twice daily, two pills in AM, one in PM |
| Dosing/ Administration | Formulation | 31 | Formulation | 1 | Oral capsule or tablet | Formulation (how the drug is administered) | 1 | Oral capsule or tablet |
| 2 | Injection | 2 | Injection |
| 3 | Depot injection | 3 | Depot injection |
| 4 | Vaginal ring or similar | 4 | Vaginal ring or similar |
| - |  | - | ~~-~~ |
| Other | Fertility | 32 | Ability to preserve fertility in the long term | 1 | No | Ability to preserve fertility in the long term | 1 | No |
| 2 | Yes | 2 | Yes |
| Other | Contraception | 33 | No need to take a concomitant contraceptive measure (e.g., birth control, IUD, barrier contraception)/provides the contraceptive effect | 1 | Yes, need to take concomitant contraceptive measures | No need to take or use birth control to prevent pregnancy while taking the medication | 1 | Still need to take birth control to prevent pregnancy |
| 2 | No, no need to take concomitant contraceptive measures | 2 | No need to take or use birth control to prevent pregnancy |
| Other | Clinical trial data availability | 34 | Availability of real-world evidence to support treatment in certain patient types | 1 | No | Proven medication effect outside of a clinical trial (i.e., real-world evidence) that shows benefits of medication | 1 | No |
| 2 | Yes | 2 | Yes |
| Other | Cost | 35 | Reduction in fibroid related hospitalization | 1 | Reduce hospitalization by 1 day | Reduction in length of fibroid-related hospitalization | 1 | Reduce hospitalization by 1 day |
| 2 | Reduce hospitalization by 2 or more days | 2 | Reduce hospitalization by 2 days |
| 3 | No hospitalization | 3 | No hospitalization needed |
| Other | Cost | 36 | Insurance coverage | 1 | No insurance coverage; fully paid out of pocket | Insurance Coverage | 1 | No insurance coverage; fully paid out of pocket |
| 2 | Partial insurance coverage | 2 | Partial insurance coverage |
| 3 | Fully covered by insurance | 3 | Fully covered by insurance |
| Other | Cost | 37 | Patient out-of-pocket cost | 1 | $350 monthly | Patient out-of-pocket cost | 1 | $350 monthly |
| 2 | $200 monthly | 2 | $200 monthly |
| 3 | $75 monthly | 3 | $75 monthly |
| 4 | $5 monthly | 4 | $5 monthly |
| - | - | - | - |
| Other | Manufacturer Support | 38 | Manufacturer provides educational support to patients with uterine fibroids | 1 | Manufacturer provides no educational support | Manufacturer provides educational support to patients with uterine fibroids | 1 | Manufacturer provides no educational support |
| 2 | Manufacturer provides in-clinic pamphlets and brochures | 2 | Manufacturer provides in-clinic pamphlets and brochures |
| 3 | Manufacturer provides online educations | 3 | Manufacturer provides online education through videos/webinars |
| 4 | Manufacturer provides in-person education through a group class | 4 | Manufacturer provides in-person education through a group class |
| 5 | Manufacturer provides personalized in-person (one-on-one) education |  | 5 | Manufacturer provides personalized in-person (one-on-one) education |
| Other | Manufacturer Support | 39 | Manufacturer provides treatment-related support to patients with uterine fibroids | 1 | Manufacturer provides no treatment-related support | Patient support programs offered through manufacturer | 1 | Manufacturer provides no treatment-related support |
| 2 | Manufacturer provides free samples | 2 | Co-pay assistance program/savings card |
| 3 | Manufacturer provides patient assistance programs | 3 | Nurse ambassador online |
|  |  | 4 | Coupon for payment |
| Other | Manufacturer Support | 40 | Manufacturer supports office staff with prior authorization | 1 | Manufacturer provides no support during PA process | N/A* | 1 |  |
| 2 | PA tracker provided by manufacturer | 2 |  |
| 3 | Templates for appeals | 3 |  |
| 4 | Templates for prior authorization | 4 |  |
| 5 | Template for medical necessity | 5 |  |
| 6 | Denial consideration templates | 6 |  |
| Other | Manufacturer Support | 41 | Prior authorization time of approval | 1 | Prior authorization required with average 1-month approval | Prior authorization time of approval | 1 | Prior authorization required with average 1-month approval |
| 2 | Prior authorization required with average 3-week approval | 2 | Prior authorization required with average 3-week approval |
| 3 | Prior authorization required with average 2-week approval | 3 | Prior authorization required with average 2-week approval |
| 4 | Prior authorization required with average 1-week approval | 4 | Prior authorization required with average 1-week approval |
| 5 | No prior authorization required | 5 | No prior authorization required |
| Other | Manufacturer Support | 42 | Availability of features within a patient program | 1 | Provider Insurance lookup | Availability of features within a one-stop-shop patient program | 1 | Provider Insurance lookup |
| 2 | Co-pay assistance | 2 | Co-pay assistance |
| 3 | Insurance specialist assistance | 3 | Insurance specialist assistance |
| 4 | Prior-authorization support | 4 | Prior-authorization support |
| 5 | Free medication samples | 5 | Free medication samples |

Attributes listed in the table comprise the 42 attributes used in the final HCP survey and 38 attributes used in the final patient survey. Both surveys assessed the same types of treatment attributes; however, different terminology was used to describe these attributes between the HCP and patient survey.

*Several attributes were deemed highly technical and/or less relevant for patient consideration, and hence were only included in the HCP survey. DVT, deep vein thrombosis; HCP, healthcare provider; HR-QOL, health-related quality of life; IUD, intrauterine device; MBL, menstrual blood loss; N/A, not applicable; PA, prior authorization; PE, pulmonary embolism; UF, uterine fibroid; UFS-QOL, Uterine Fibroid Symptom Health-Related Quality of Life Questionnaire.

Supplementary Table 2. Baseline characteristics and demographics of HCPs

| **Demographics** |  |
| --- | --- |
| **HCPs** | **N=375** |
| **Role (%)** |  |
| Obstetrician/Gynecologist | 53 |
| Family Practice Physician | 33 |
| Nurse Practitioner | 13 |
| **Location (%)** |  |
| Urban | 65 |
| Suburban | 30 |
| Rural | 5 |
| **Place of work (%)** |  |
| Large group practice (10+ doctors) or center | 38 |
| Small group practice (2–10 doctors) or center | 25 |
| Regional healthcare chain* | 23 |
| Freestanding/independent practice or center† | 13 |
| National healthcare chain* | 2 |
| **Average years of practice** | 13 |
| **Average number of patients with UF seen each month** | 56 |
| **HCP’s patients** | |
| **Patient age (%)** |  |
| 18 years or less | 8 |
| 20–29 years | 18 |
| 30–39 years | 28 |
| 40–49 years | 31 |
| 50+ years | 16 |
| **Patient insurance coverage (%)** |  |
| Private insurance | 39 |
| Medicare | 27 |
| Medicaid | 24 |
| No coverage | 10 |
| **Patient ethnicity (%)** |  |
| White | 41 |
| Black or African American | 23 |
| Latin American or Hispanic | 13 |
| Native American or Alaska Native | 8 |
| Asian | 7 |
| Native Hawaiian and Pacific Islander | 4 |
| Middle East or Central Asia | 4 |
| **Symptoms of UF patients (%)** |  |
| Symptomatic, requiring treatment | 44 |
| Symptomatic, but not requiring treatment | 28 |
| Asymptomatic | 29 |

*Multiple sites across a limited geographical area covering up to five states. †Single physician/sole practitioner.
Patient race and ethnicity were not distinguished during the completion of the questionnaire. HCP, healthcare provider; UF, uterine fibroids.

Supplementary Table 3. Baseline characteristics and demographics of patients

| **Demographics** | |
| --- | --- |
| **Patients** | **N=300** |
| **Location (%)** |  |
| Urban | 76 |
| Suburban | 15 |
| Rural | 9 |
| **Age category (%)** |  |
| Mean age, years | 42 |
| 18–29 | 4 |
| 30–44 | 49 |
| 40–55 | 48 |
| **Mean age at first diagnosis, years** | 37 |
| **Patient insurance coverage (%)** |  |
| Paid by patient | 46 |
| Employer/Union plan | 38 |
| Medicaid | 13 |
| Military/Veteran | 3 |
| **Given birth? (%)** |  |
| Yes | 79 |
| No | 22 |
| **Number of children living in household (%)** |  |
| 1 | 54 |
| 2 | 43 |
| 3 | 4 |
| **Education level (%)** |  |
| Bachelor’s degree | 46 |
| Graduate degree | 24 |
| Associate degree | 19 |
| Some college, no degree | 9 |
| High school equivalent (GED) | 2 |
| **Current employment status (%)** |  |
| Full-time (30+ hours/week) | 84 |
| Part-time (<30 hours per week) | 8 |
| Homemaker | 7 |
| Not currently employed | 1 |
| **Patient ethnicity (%)** |  |
| White | 62 |
| Black or African American | 23 |
| Latin American or Hispanic | 12 |
| Native American or Alaska Native | 6 |
| Asian | 4 |
| **Comorbidities (%)** |  |
| None | 65 |
| Hypertension | 12 |
| T2DM | 10 |
| Mental health conditions | 6 |
| High cholesterol | 5 |
| Fibromyalgia | 4 |
| Asthma, COPD, or other chronic lung disease | 4 |
| T1DM | 3 |
| Kidney disease | 2 |
| High triglycerides | 2 |

COPD, chronic obstructive pulmonary disease; GED, General Educational Development; T1DM, type 1 diabetes mellitus; T2DM, type 2 diabetes mellitus.

**Supplementary Table 4. RI scores for treatment attributes by segment and overall in HCP survey**

| **Theme** | | **Benefits** | **RI** | | | | |
| --- | --- | --- | --- | --- | --- | --- | --- |
| **Efficacy-focused (N=99; 26%)** | **Safety-focused (N=97; 26%)** | **Convenience-focused (N=93; 25%)** | **Economics-focused (N=86; 23%)** | **Overall HCP sample**  **(N=375)** |
| Efficacy | Key Endpoint | Mean time to a clinically meaningful improvement in menstrual bleeding (defined as MBL volume <80 mL and reduction of ≥50%) | 110 | 95 | 97 | 101 | 101 |
| Key Endpoint | Mean % reduction in MBL at 6 months | 128 | 96 | 99 | 104 | 107 |
| Key Endpoint | % of patients achieving MBL volume <80 mL at 6 months from baseline | 134 | 103 | 98 | 93 | 108 |
| Key Endpoint | % of patients with a reduction in MBL volume ≥50% at 6 months from baseline | 115 | 105 | 100 | 96 | 104 |
| Key Endpoint | % of patients achieving amenorrhea at 6 months from baseline | 116 | 102 | 87 | 111 | 104 |
| Key Endpoint | % reduction in fibroid volume at 6 months from baseline | 91 | 92 | 92 | 113 | 97 |
| Key Endpoint | % reduction in uterine volume at 6 months from baseline | 107 | 97 | 89 | 89 | 96 |
| Secondary Endpoint | % of anemic patients (hemoglobin level ≤ 10.5 g/dL) with improvement in hemoglobin levels (>2 g/dL) at 6 months after baseline | 117 | 99 | 107 | 101 | 106 |
| Durability | Duration of clinical evidence (how long the medicine has been studied before it becomes available to UF patients) | 88 | 106 | 86 | 85 | 92 |
| PRO | % of patients with clinically meaningful improvement in bleeding and pelvic discomfort (via a validated instrument that focuses on heavy menstrual bleeding, passing blood clots, pelvic pressure, and tightness) at 6 months from baseline | 137 | 91 | 99 | 119 | 111 |
| PRO | Mean change (reduction) in symptom severity at 6 months from baseline (as measured by UFS-QOL questionnaire, 0–100 scale) | 111 | 99 | 99 | 101 | 103 |
| PRO | Mean change (reduction) in concern at 6 months from baseline (as measured by UFS-QOL questionnaire, 0–100 scale) | 110 | 101 | 95 | 82 | 98 |
| PRO | Mean change (increase) in daily activities at 6 months from baseline (as measured by UFS-QOL questionnaire, 0–100 scale) | 114 | 103 | 103 | 87 | 102 |
| PRO | Mean change (increase) in energy and mood at 6 months from baseline (as measured by UFS-QOL questionnaire, 0–100 scale) | 107 | 99 | 92 | 81 | 95 |
| PRO | Mean change (improvement) in control (i.e., ability to control own body) at 6 months from baseline (as measured by UFS-QOL questionnaire, 0–100 scale) | 109 | 102 | 99 | 85 | 99 |
| PRO | Mean change (improvement) in self-consciousness at 6 months from baseline (as measured by UFS-QOL questionnaire, 0–100 scale) | 110 | 98 | 85 | 93 | 97 |
| PRO | Mean change (improvement) in sexual function at 6 months from baseline (as measured by UFS-QOL questionnaire, 0–100 scale) | 109 | 101 | 100 | 89 | 100 |
| PRO | % of patients with UF-associated pain at baseline, with self-reported improvement in menstrual pain (dysmenorrhea) at 6 months from baseline | 108 | 106 | 98 | 82 | 99 |
| PRO | % of patients with UF-associated pain at baseline, with self-reported improvement in non-menstrual pain associated with UF at 6 months from baseline | 109 | 100 | 93 | 101 | 101 |
| Surgery | Impact of medication on myomectomy | 99 | 99 | 104 | 114 | 104 |
| Surgery | Impact of medication on hysterectomy | 96 | 92 | 103 | 153 | 110 |
| Surgery | % of patients not requiring surgery because of treatment | 104 | 102 | 89 | 138 | 108 |
| Safety | Bone Loss | % change in bone mineral density at lumbar spine due to drug effect at 1 year from baseline you would consider not clinically meaningful | 100 | 108 | 90 | 83 | 96 |
| Secondary Endpoint | Acceptable % of patients with reduction in mean bone mineral density at lumbar spine due to drug effect (not age-related) at 1 year from baseline | 98 | 105 | 92 | 82 | 95 |
| Tolerability | % of patients who discontinue treatment due to side effects 6 months from baseline | 94 | 105 | 97 | 84 | 95 |
| Adverse Events | % of patients with treatment-related vasomotor symptoms like hot flashes or night sweats at 6 months from the start of treatment | 100 | 109 | 97 | 97 | 101 |
| Adverse Events | % of patients with treatment-related alopecia | 76 | 111 | 92 | 87 | 92 |
| Black Box Warning | Medication comes with a black box warning related to increased risk of thromboembolic and cardiovascular events (e.g., DVT/PE) | 82 | 105 | 95 | 78 | 90 |
| Dosing | Dosing | Dosing schedule | 83 | 109 | 120 | 100 | 103 |
| Formulation | Formulation | 84 | 95 | 110 | 94 | 96 |
| Other | Fertility | Ability to preserve fertility in the long term | 106 | 94 | 113 | 134 | 111 |
| Contraception | No need to take a concomitant contraceptive measure (e.g., birth control, IUD, barrier contraception)/provides the contraceptive effect | 87 | 84 | 132 | 87 | 97 |
| Clinical Trial Data Availability | Availability of real-world evidence to support treatment in certain patient types | 82 | 82 | 101 | 83 | 87 |
| Cost | Reduction in fibroid related hospitalization | 91 | 91 | 102 | 119 | 100 |
| Cost | Insurance coverage | 89 | 117 | 99 | 188 | 121 |
| Cost | Patient out-of-pocket cost | 103 | 130 | 103 | 164 | 124 |
| Manufacturer Support | Manufacturer provides educational support to patients with uterine fibroids | 79 | 93 | 108 | 78 | 90 |
| Manufacturer Support | Manufacturer provides treatment-related support to patients with uterine fibroids post-authorization | 81 | 94 | 118 | 68 | 91 |
| Manufacturer Support | Manufacturer supports office staff with prior authorization | 79 | 96 | 110 | 84 | 93 |
| Manufacturer Support | Prior authorization time of approval | 77 | 92 | 112 | 97 | 94 |
| Manufacturer Support | Availability of features within a patient program | 79 | 88 | 97 | 76 | 85 |

Red shading indicates treatment attributes that are differentiating drivers for that segment (i.e., 10 points higher or lower than the overall sample mean).
DVT, deep-vein thrombosis; IUD, intrauterine device; HCP, healthcare provider; MBL, menstrual blood loss; PE, pulmonary embolism; PRO, patient reported outcome; RI, relative importance; UF, uterine fibroids; UF-QOL, uterine fibroid quality of life.

**Supplementary Table 5. RI scores for treatment attributes by segment and overall in patient survey**

| **Theme** | | **Benefits** | **RI** | | | | |
| --- | --- | --- | --- | --- | --- | --- | --- |
| **Symptom  relief-driven**  **(N=127; 42%)** | **Information-driven**  **(N=67; 22%)** | **Cost-sensitive and**  **surgery-averse (N=58; 20%)** | **Risk-averse**  **(N=48; 15%)** | **Overall patient sample**  **(N=300)** |
| Efficacy | Key Endpoint | Time to meaningful improvement in menstrual bleeding that impacts your daily life | 116 | 95 | 103 | 102 | 107 |
| Key Endpoint | Reduction in MBL after 6 months of treatment | 114 | 89 | 97 | 94 | 102 |
| Key Endpoint | Chance of achieving normal MBL after 6 months of treatment | 105 | 96 | 78 | 117 | 99 |
| Key Endpoint | Chance of achieving absence of menstruation (no bleeding) after 6 months of treatment | 111 | 100 | 102 | 92 | 104 |
| Key Endpoint | Reduction in size of fibroids after 6 months of treatment | 90 | 95 | 130 | 87 | 99 |
| Key Endpoint | Reduction in size of uterus after 6 months of treatment | 92 | 81 | 94 | 88 | 89 |
| Secondary Endpoint | Chance of achieving an improvement in anemia after 6 months of treatment | 110 | 89 | 98 | 93 | 100 |
| Durability | How long the medicine has been studied before it becomes available to UF patients | 99 | 129 | 84 | 90 | 101 |
| PRO | Chance of experiencing a meaningful improvement in bleeding and pelvic pressure after 6 months of treatment | 109 | 120 | 99 | 122 | 111 |
| PRO | Improvement in symptom severity at 6 months after starting treatment | 113 | 94 | 80 | 108 | 102 |
| PRO | Improvement in concerns at 6 months after starting treatment | 106 | 101 | 91 | 85 | 99 |
| PRO | Improvement in daily activities at 6 months after starting treatment | 98 | 92 | 121 | 102 | 102 |
| PRO | Improvement in energy and mood at 6 months after starting treatment | 100 | 97 | 92 | 76 | 94 |
| PRO | Improvement in control at 6 months after starting treatment | 101 | 78 | 80 | 98 | 91 |
| PRO | Improvement in self-consciousness at 6 months after starting treatment | 111 | 86 | 97 | 101 | 101 |
| PRO | Improvement in sexual function at 6 months after starting treatment | 99 | 95 | 81 | 89 | 93 |
| PRO | Improvement in pain during the menstrual period after 6 months of treatment | 98 | 90 | 109 | 103 | 99 |
| PRO | Improvement in non-menstrual UF-related pain after 6 months of treatment | 98 | 96 | 105 | 101 | 99 |
| PRO | Impact of medication on the need for myomectomy as a treatment option for UF | 97 | 105 | 99 | 137 | 105 |
| Surgery | Impact of medication on the need for hysterectomy as a treatment option for UF | 105 | 108 | 150 | 106 | 115 |
| Safety | Bone Loss | Change in BMD at lumbar spine due to drug effect (not age-related) after 1 year of treatment (low BMD is associated with increased risk of fracture) | 101 | 111 | 81 | 154 | 107 |
| Tolerability | Number of women who stop taking treatment due to any side effect after 6 months of treatment | 103 | 125 | 88 | 91 | 103 |
| Adverse Events | Number of women who have symptoms like hot flashes or night sweats after 6 months of treatment | 92 | 119 | 95 | 80 | 97 |
| Adverse Events | Number of women with symptoms like alopecia (general hair loss) | 94 | 112 | 94 | 98 | 99 |
| Black Box Warning | Medication comes with a warning related to increased risk of thromboembolic (reduction in blood flow) and heart-related events | 98 | 102 | 110 | 171 | 112 |
| Dosing / Administration | Dosing | Dosing schedule | 95 | 82 | 117 | 109 | 99 |
| Formulation | Formulation | 91 | 103 | 83 | 90 | 92 |
| Other | Fertility | Ability to preserve fertility in the long term | 95 | 78 | 87 | 82 | 88 |
| Contraception | No need to take or use birth control to prevent pregnancy while taking the medication | 94 | 105 | 106 | 103 | 100 |
| Clinical trial data availability | Proven medication effect outside of a clinical trial (i.e., real-world evidence) that shows benefits of medication | 108 | 92 | 95 | 104 | 101 |
| Cost | Reduction in length of fibroid related hospitalization | 112 | 89 | 94 | 91 | 100 |
| Cost | Insurance coverage | 91 | 81 | 109 | 83 | 91 |
| Cost | Patient out-of-pocket cost | 81 | 98 | 146 | 90 | 99 |
| Manufacturer Support | Manufacturer provides educational support to patients with UF | 107 | 134 | 116 | 95 | 113 |
| Manufacturer Support | Patient support programs offered through manufacturer | 86 | 111 | 103 | 76 | 94 |
| Manufacturer Support | Prior authorization time of approval | 92 | 86 | 92 | 110 | 93 |
| Manufacturer Support | Availability of features within a one-stop-shop patient program | 88 | 135 | 93 | 80 | 98 |

Red shading indicates treatment attributes that are differentiating drivers for that segment (i.e., 10 points higher or lower than the overall sample mean).
BMD, bone mineral density; MBL, menstrual blood loss; PRO, patient reported outcome; RI, relative importance; UF, uterine fibroids; UFS-QOL, Uterine Fibroid Symptom Health-Related Quality of Life Questionnaire.
